# Supplementary material
Source: PubMed Central journal article supplement (PMC7944378)
Supplement: jama-e211233-s002.pdf [file jama-e211233-s002.pdf]

1 **Original CSM-S Statistical Analysis Protocol**

2 Developed in 2013 by Dr. James Dziura and Dr. Zoher Ghogawala

3  
4 After funding was received from NIH and PCORI we published the planned CSM-S  
5 study design, rationale, and protocol.<sup>1</sup>

6 Preliminary observational data showed mean 1-year SF-36 PCS difference scores of  
7 8.7 for ventral surgery compared with 4.0 for dorsal procedures (SD between 10 and  
8 12) and correlations of baseline with 1-year SF-36 PCS between 0.6 and 0.7. We  
9 calculated a total sample size (2:3 ventral-dorsal randomization) required to detect a 5-  
10 point difference between ventral and dorsal groups.

11 A minimum sample size of **137** patients provides at least 90% power (see Tables  
12 below):  
13

| Surgery (N)        | Pre-op      | Post-Op     | Correlation between Pre- and Post-Op | Difference   |
|--------------------|-------------|-------------|--------------------------------------|--------------|
| Ventral (45)       | 35.5 ± 10.3 | 44.2 ± 11.7 | 0.64                                 | + 8.7 ± 8.2  |
| Dorsal (70)        | 35.8 ± 11.3 | 39.8 ± 11.6 | 0.66                                 | + 4.0 ± 9.5  |
| Dorsal Fusion (42) | 35.0 ± 11.7 | 39.6 ± 12.4 | 0.65                                 | + 4.6 ± 10.0 |
| Laminoplasty (28)  | 37.0 ± 10.9 | 40.1 ± 10.6 | 0.67                                 | + 3.1 ± 8.8  |
| All patients (115) | 35.7 ± 10.9 | 41.5 ± 11.8 | 0.64                                 | + 5.8 ± 9.7  |

14  
15  
16  
17  
18

| Difference / SD | Correlation | 80% Power /               |                     |            | 90% Power /               |                     |            |
|-----------------|-------------|---------------------------|---------------------|------------|---------------------------|---------------------|------------|
|                 |             | 5% Type I error (2-sided) |                     |            | 5% Type I error (2-sided) |                     |            |
|                 |             | N <sub>Ventral</sub>      | N <sub>Dorsal</sub> | N          | N <sub>Ventral</sub>      | N <sub>Dorsal</sub> | N          |
| 5 / SD = 10     | 0.60        | 38                        | 56                  | <b>94</b>  | 50                        | 74                  | <b>124</b> |
| 5 / SD = 10     | 0.65        | 40                        | 59                  | <b>99</b>  | 53                        | 78                  | <b>131</b> |
| 5 / SD = 10     | 0.70        | 42                        | 62                  | <b>104</b> | 55                        | 82                  | <b>137</b> |

19  
20 A minimum sample size of 137 across both study arms was inflated by 15% to  
21 accommodate anticipated attrition during follow-up, for a final accrual goal of 159  
22 randomized.

23 Primary analyses will include all subjects randomized using an intent-to-treat  
24 approach. The primary endpoint is the 1-year change in Physical Component Summary  
25 of the SF-36 (SF-36 PCS) at one year. A likelihood-based analysis using a mixed model  
26 will be used to compare SF-36 PCS between groups. This model will adjust for baseline  
27 SF-36 PCS, as well as study surgeon using a random effects model. All time points will  
28 be included in the model, and each subject will contribute data for the time points at  
29 which they were assessed. The model will enable a statistical comparison between  
30 treatment groups at each time point, though the comparison at the one-year time point  
31 will be the primary analysis. The primary advantage of the mixed model, when  
32 compared to commonly used methods such as complete case analysis and single  
33 imputation (e.g. last observation carried forward), is its flexibility in handling missing  
34 data. This analysis will assume that missing data occurs at random (i.e. the missing  
35 data value can be dependent on observed data, but independent of unobserved data).  
36 The inclusion of all follow-up time points in the model as well as covariates identified to

37 be associated with withdrawal will assist in meeting this assumption and minimizing the  
38 risk of bias. Although the assumption for missing data is weaker under the likelihood  
39 based analysis compared to complete case analysis, a non-ignorable missing data  
40 mechanism is possible. Sensitivity analysis using selection and pattern mixture models  
41 will be employed to evaluate the robustness of conclusions to the missing at random  
42 (MAR) assumption.

### 43 Revised Statistical Analysis Plan

44 June 11, 2019

45 The following plan was developed by Dr. Norma Terrin, Dr. Karen Freund, Ms. Janis  
46 Breeze, and Dr. Zohar Ghogawala prior to the review of any outcomes data from the  
47 CSM-S trial.

48 A revised sample size calculation was performed from preliminary data, partway  
49 through the trial, using an estimated within-group standard deviation of 9 points. The  
50 revised sample size estimate was consistent with the original number of 159 patients.<sup>1</sup>

51 Primary analysis will compare change in 1-year SF-36 PCS outcomes for patients as  
52 randomized. We will perform an unadjusted analysis because we determined that the  
53 baseline characteristics were not different between ventral and dorsal groups. We will  
54 not perform any specific analysis for missing data because the 1-year follow-up was  
55 95%.

56 Since those randomized to a dorsal surgery included both DF and DL, a pre-  
57 specified secondary analysis of patients will compare 1-year change in SF-36 PCS  
58 among the 'as treated' groups (DF versus VF, DL versus DF, DL versus VF). This

59 secondary analysis is pre-specified - 'as treated' (placing cross-overs into their actual  
60 treatment cohort) and reflects non-random treatment assignment in the dorsal arm (DL  
61 versus DF, as selected by the treating surgeon). Continuous outcomes (change scores  
62 for SF-36 PCS, NDI, mJOA, EQ-5D) will be compared using ANOVAs for differences in  
63 means, with 95% confidence intervals. Categorical outcomes (risk of complications;  
64 health resource utilization) will be compared using chi-square tests, with 95%  
65 confidence intervals for difference in proportions. All testing will be two-sided with  
66  $\alpha=0.05$ .

67 Revised Statistical Analysis Plan – 2 year outcomes data

68 July 12, 2020

69 The following plan was developed by Dr. Norma Terrin, Janis Breeze, and Dr. Zoher  
70 Ghogawala prior to the analysis of any 2-year outcomes data.

71 Primary analysis will include all subjects randomized using an intent-to-treat approach.  
72 The primary endpoint is the *1-year change* in Physical Component Summary of the SF-  
73 36 (SF-36 PCS) at one year.

74

#### 75 **Analysis Plan for Year 2 Outcomes**

76

77 Year 2 outcomes for SF-36 and other continuous outcomes will be  
78 analyzed using linear mixed effects models (lme) that include both first  
79 and second year outcomes. The outcomes will be change from

80 baseline. The purpose of the lme is to address missing second year  
81 outcomes. Since the year 2 assessments were missing mainly for  
82 logistical reasons (at 2 sites, research staff neglected to follow up with  
83 participants during specific time intervals), the missing at random  
84 (MAR) assumption of the lme is valid. The model will include treatment  
85 group, time period, and group\*time interaction. To address within-  
86 subject correlation, patient id will be a random effect. There will be no  
87 adjustment for surgeon, since some surgeons had few patients, and no  
88 adjustment for baseline variables, since these were similar between  
89 groups. The treatment effect at year 2 will be tested using model  
90 contrasts. The year 1 treatment effect will be tested similarly, to  
91 confirm previous analyses obtained by t-test and anova. The models  
92 will be used to compare the 2 randomized groups and the “as treated  
93 groups.” We will not address multiple comparisons for the “as treated”  
94 analyses because they are considered to be exploratory.

### 95 **Analysis Plan for Return to Work**

96  
97 The return to work analysis will include all time periods up to 12  
98 months (1, 3, 6, and 12 months). Groups will be compared via Kaplan-  
99 Meier plots and log-rank tests. To address multiple comparisons when  
100 comparing the as-treated groups pairwise comparisons will be  
101 performed at  $p=0.025$  to account for 2 comparisons (DL vs DF and DL  
102 vs VF).

103

104

105 References

- 106 1. Ghogawala Z, Benzel EC, Heary RF, et al. Cervical spondylotic myelopathy  
107 surgical trial: randomized, controlled trial design and rationale. *Neurosurgery*. Oct  
108 2014;75(4):334-346.

109

110
