# Supplementary material
Source: PubMed Central journal article supplement (PMC7944378)
Supplement: jama-e211233-s004.pdf [file jama-e211233-s004.pdf]

Ghogawala Z, Terrin N, Dunbar MR, et al. Effect of ventral vs dorsal spinal surgery on patient-reported physical functioning in patients with cervical spondylotic myelopathy: a randomized clinical trial. *JAMA*. Published March 9, 2021. doi:10.1001/jama.2021.1233

## Data Sharing Statement

### Data

**Data available:** Yes

**Data types:** Deidentified participant data, Data dictionary

**How to access data:** Requests for deidentified participant data can be emailed directly to [Zoher.Ghogawala@lahey.org](mailto:Zoher.Ghogawala@lahey.org)

**When available:** With publication

### Supporting Documents

**Document types:** Informed consent form

**How to access documents:** Requests for the informed consent form can be directly emailed to [Zoher.Ghogawala@lahey.org](mailto:Zoher.Ghogawala@lahey.org)

**When available:** With publication

### Additional Information

**Who can access the data:** Researchers whose proposed use of the data has been approved.

**Types of analyses:** Analysis for future randomized controlled studies

**Mechanisms of data availability:** approval of proposal with signed data access agreement
